# Supplementary material for: Enhanced mechanically induced red-light emitting novel mechanoluminescence materials for ultrasonic visualization and monitoring applications
Source: Royal Society of Chemistry journal article supplement (doi:10.1039/d0tc05739h), 2021-01-01
Supplement: d0tc05739h1.pdf [file d0tc05739h1.pdf]

**Enhanced Mechanically Induced Red-light Emission Novel  
Mechanoluminescence Material for Ultrasonic Visualization and  
Monitoring Application**

*Yu-Ting Fan*<sup>a</sup>, *Yun-Ling Yang*<sup>a</sup>, *Ting Li*<sup>a</sup>, *Jia-Yong Yuan*<sup>a</sup>, *Qian-Li Li*<sup>a</sup>, *Jing-Tai Zhao*  
*b,\**, *Dong-Yun Wan*<sup>a,\*</sup>, *Zhi-Jun Zhang*<sup>a,\*</sup>

<sup>a</sup> School of Materials Science and Engineering, Shanghai University, Shanghai,  
200072, P.R. China

E-mail: zhangzhijun@shu.edu.cn

E-mail: echowandy@shu.edu.cn

<sup>b</sup> School of Materials Science and Engineering, Guilin University of Electronic  
Technology, Guilin 541004, China.

E-mail: jtzhao@guet.edu.cn

**Table S1.** The Refinement data for  $\text{Ca}_{1-x}\text{Sr}_x\text{Zn}_{0.98}\text{OS}:\text{Mn}^{2+}$  ( $x = 0, 0.03, 0.09, 0.15, 0.30$ )

|                | 0            | 0.03         | 0.09         | 0.15         | 0.30         |
|----------------|--------------|--------------|--------------|--------------|--------------|
| Space group    | $P6_3mc$     | $P6_3mc$     | $P6_3mc$     | $P6_3mc$     | $P6_3mc$     |
| a, b/Å         | 3.75650(12)  | 3.75650(12)  | 3.76691(12)  | 3.77369(24)  | 3.80338(22)  |
| c/Å            | 11.40344(38) | 11.40344(38) | 11.42103(41) | 11.42154(72) | 11.46459(70) |
| $V/\text{Å}^3$ | 139.358(8)   | 139.709(7)   | 140.348(8)   | 140.860(15)  | 143.625(15)  |
| $R_p/\%$       | 5.53         | 5.93         | 6.72         | 5.46         | 5.62         |
| $R_{wp}/\%$    | 7.65         | 8.07         | 9.14         | 7.54         | 7.80         |
| $R_{exp}/\%$   | 5.59         | 4.14         | 5.29         | 3.88         | 3.66         |
| $\chi^2$       | 1.87         | 3.79         | 2.99         | 3.78         | 4.53         |
| d(Zn-S)/Å      | 2.3717(9)    | 2.3723(9)    | 2.3777(14)   | 2.3832(14)   | 2.3979(18)   |
| d(Zn-O)/Å      | 1.8941(46)   | 1.8962(57)   | 1.9030(1)    | 1.8937(57)   | 1.9102(1)    |
| d(Ca-O)/Å      | 2.2838(16)   | 2.2841(19)   | 2.281(1)     | 2.2834(20)   | 2.3029(14)   |

**Table S2.** The quantity of all elements of  $\text{Ca}_{0.7}\text{Sr}_{0.3}\text{Zn}_{0.98}\text{OS}:\text{Mn}^{2+}$ 

| Element | Atomic percentage |
|---------|-------------------|
| O       | 29.77             |
| S       | 21.78             |
| Ca      | 12.59             |
| Mn      | 0.02              |
| Zn      | 27.47             |
| Sr      | 8.37              |
| Total   | 100.00            |

**Table S3.** The detailed trap depth and temperature consequence from ThL fitting peaks

| $x = 0$ | Trap depth (eV) | Temperature (K) | $S$    | $b$  | $x = 0.06$ | Trap depth (eV) | Temperature (K) | $S$    | $b$ |
|---------|-----------------|-----------------|--------|------|------------|-----------------|-----------------|--------|-----|
| Trap1   | 0.118           | 140.76          | $10^3$ | 3    | Trap1      | 0.124           | 146.46          | $10^3$ | 2   |
| Trap2   | 0.195           | 197.96          | $10^3$ | 1.93 | Trap2      | 0.185           | 190.61          | $10^3$ | 2   |
| Trap3   | 0.395           | 226.62          | $10^7$ | 1.13 | Trap3      | 0.284           | 223.73          | $10^5$ | 2   |
| Trap4   | 0.534           | 251.17          | $10^9$ | 2    | Trap4      | 0.336           | 261.09          | $10^5$ | 2   |
| Trap5   | 0.594           | 281.31          | $10^9$ | 1.77 | Trap5      | 0.664           | 301.38          | $10^9$ | 2   |
| Trap6   | 0.663           | 310.27          | $10^9$ | 2    | Trap6      | 0.729           | 345.71          | $10^9$ | 2   |

  

| $x=0.15$ | Trap depth (eV) | Temperature (K) | $S$    | $b$ | $x = 0.30$ | Trap depth (eV) | Temperature (K) | $S$       | $b$  |
|----------|-----------------|-----------------|--------|-----|------------|-----------------|-----------------|-----------|------|
| Trap1    | 0.179           | 180.39          | $10^3$ | 2   | Trap1      | 0.304           | 213.38          | $10^5$    | 3    |
| Trap2    | 0.281           | 223.61          | $10^5$ | 2   | Trap2      | 0.481           | 251.28          | $10^8$    | 3    |
| Trap3    | 0.421           | 259.27          | $10^7$ | 2   | Trap3      | 0.556           | 277.28          | $10^8$    | 1.81 |
| Trap4    | 0.516           | 290.92          | $10^7$ | 2   | Trap4      | 0.694           | 300.82          | $10^{10}$ | 1.79 |
| Trap5    | 0.621           | 330.58          | $10^8$ | 2   | Trap5      | 0.752           | 329.08          | $10^{10}$ | 3    |
| Trap6    | 0.831           | 382.19          | $10^9$ | 2   | Trap6      | 0.943           | 390.77          | $10^{11}$ | 3    |

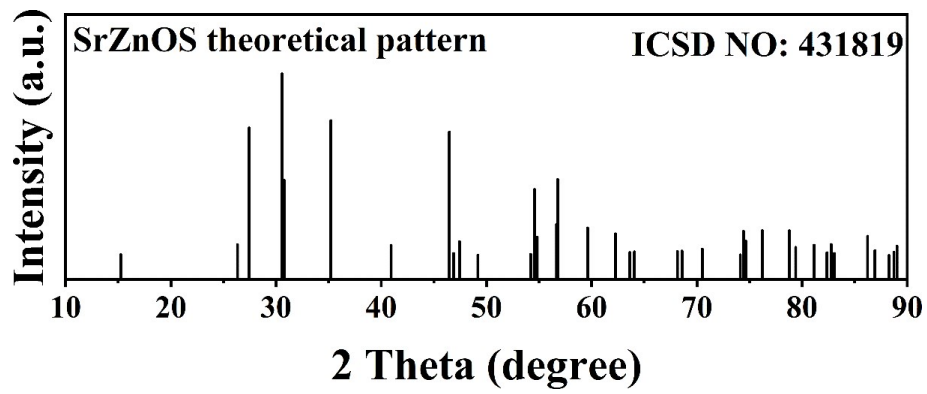

Figure S1. The SrZnOS theoretical pattern (ICSD no.: 431819)

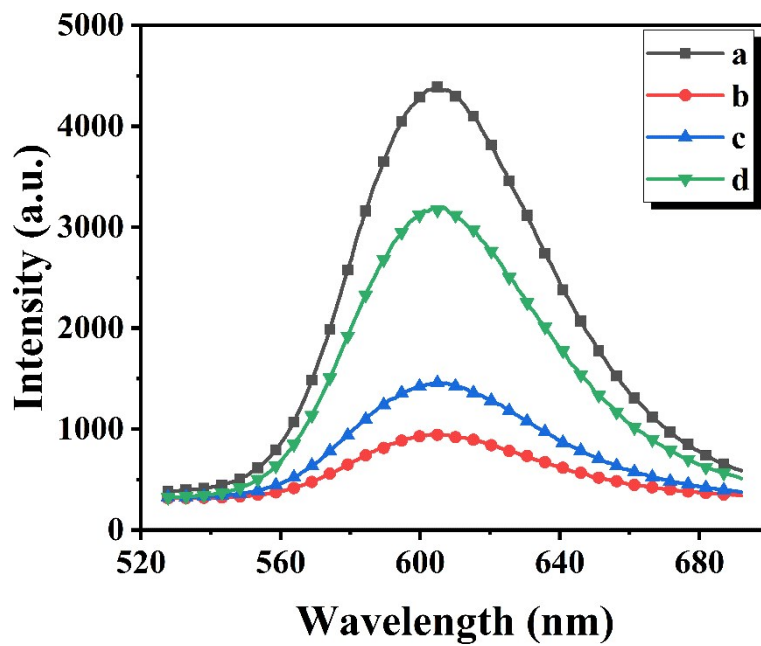

Figure S2. The emission spectra under ultrasonic excitation at different depths

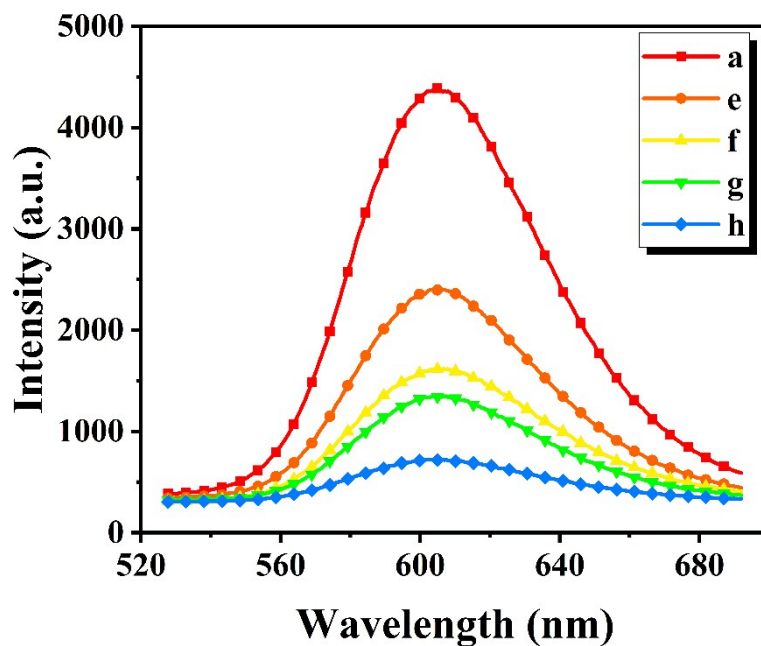

**Figure S3.** The emission spectra under ultrasonic excitation at different positions on the water surface

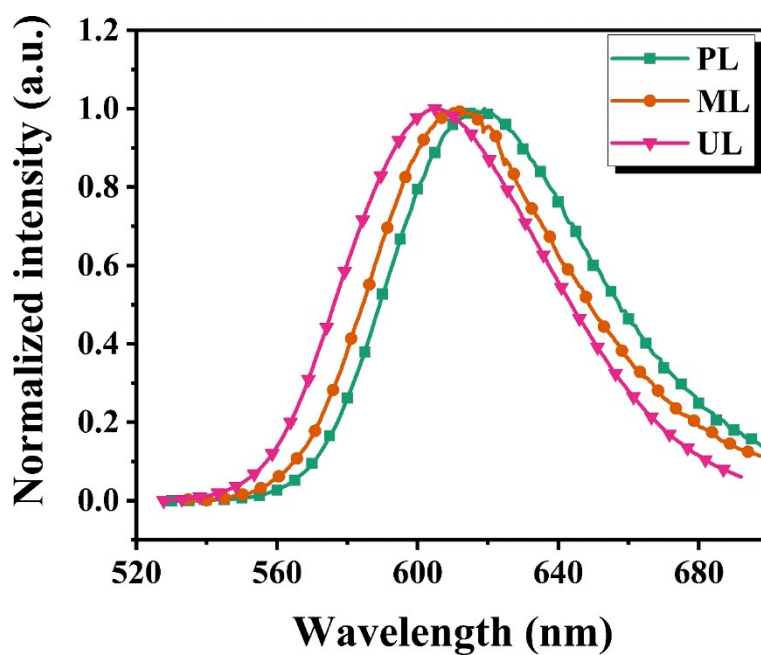

**Figure S4.** The normalized luminescence spectra of different excitation modes

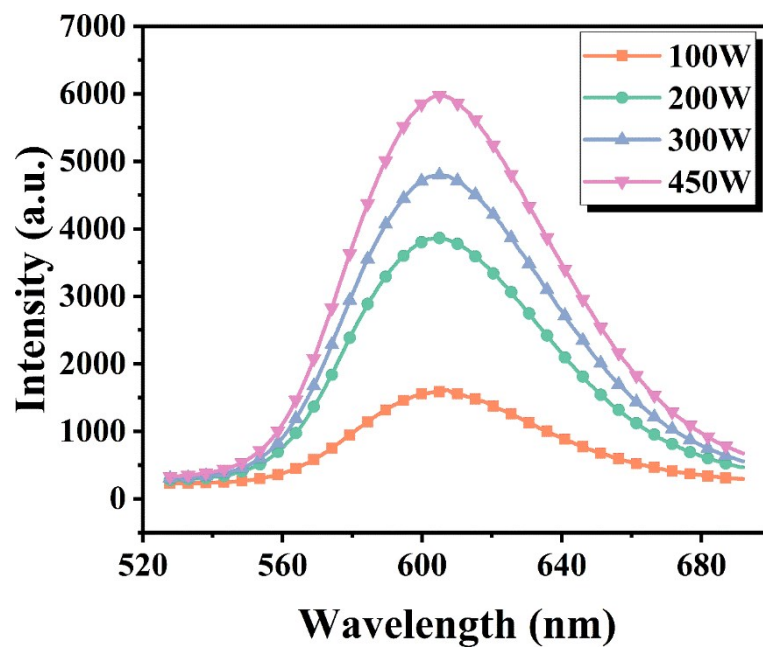

**Figure S5.** The emission spectra under ultrasonic excitation at different powers
